# Supplementary material for: Overexpression of human epidermal growth factor receptor 2 in canine primary lung cancer
Source: PubMed Central journal article supplement — J Vet Med Sci. 2020 Apr 3;82(6):804–8. doi: 10.1292/jvms.20-0026 (PMC7324825; doi:10.1292/jvms.20-0026), 2020-04-03

**Supplementary Fig. 1.**

Human epidermal growth factor receptor 2 (HER2) scoring of canine primary lung cancer (cPLC) based on the American Society of Clinical Oncology/College of American Pathologists guidelines. Representative images of the staining pattern of HER2 in cPLC. Scale bar, 100  $\mu$ m.

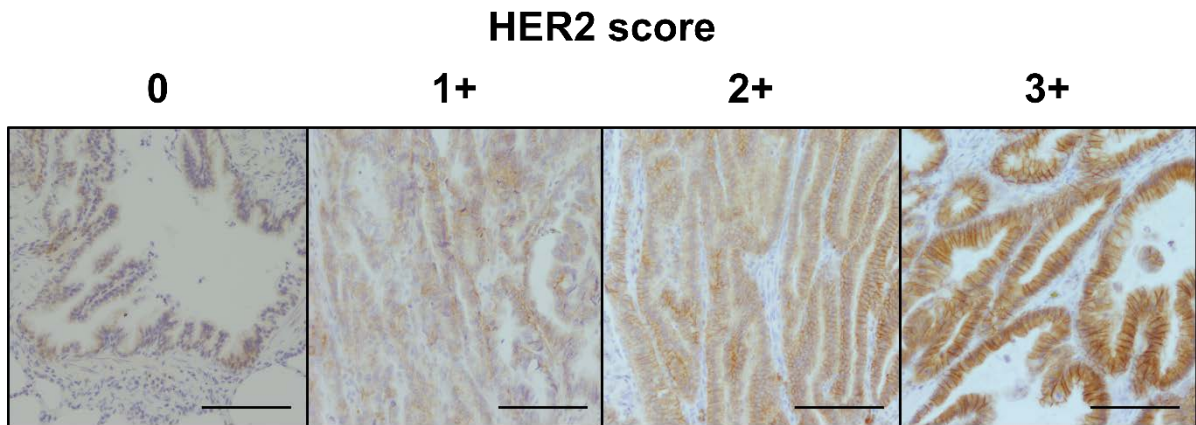

Supplement: jvms-82-804-s001.pdf [file jvms-82-804-s001.pdf]
